# Supplementary material
Source: PubMed Central journal article supplement (PMC8062616)

Supplementary tables and figures

Table 1S. Pap smears' contingency table

| Pap smear at 6 months | Atrophy or subatrophy | Mature |                  |
|-----------------------|-----------------------|--------|------------------|
| Pap smear at baseline |                       |        |                  |
| Atrophy or subatrophy | 33                    | 1      |                  |
| Mature                | 1                     | 6      |                  |
|                       |                       |        | P = 1 (MacNemar) |

Figure 1S. Evolution of FSFI total score over time according to endocrine therapy status (yes/never)

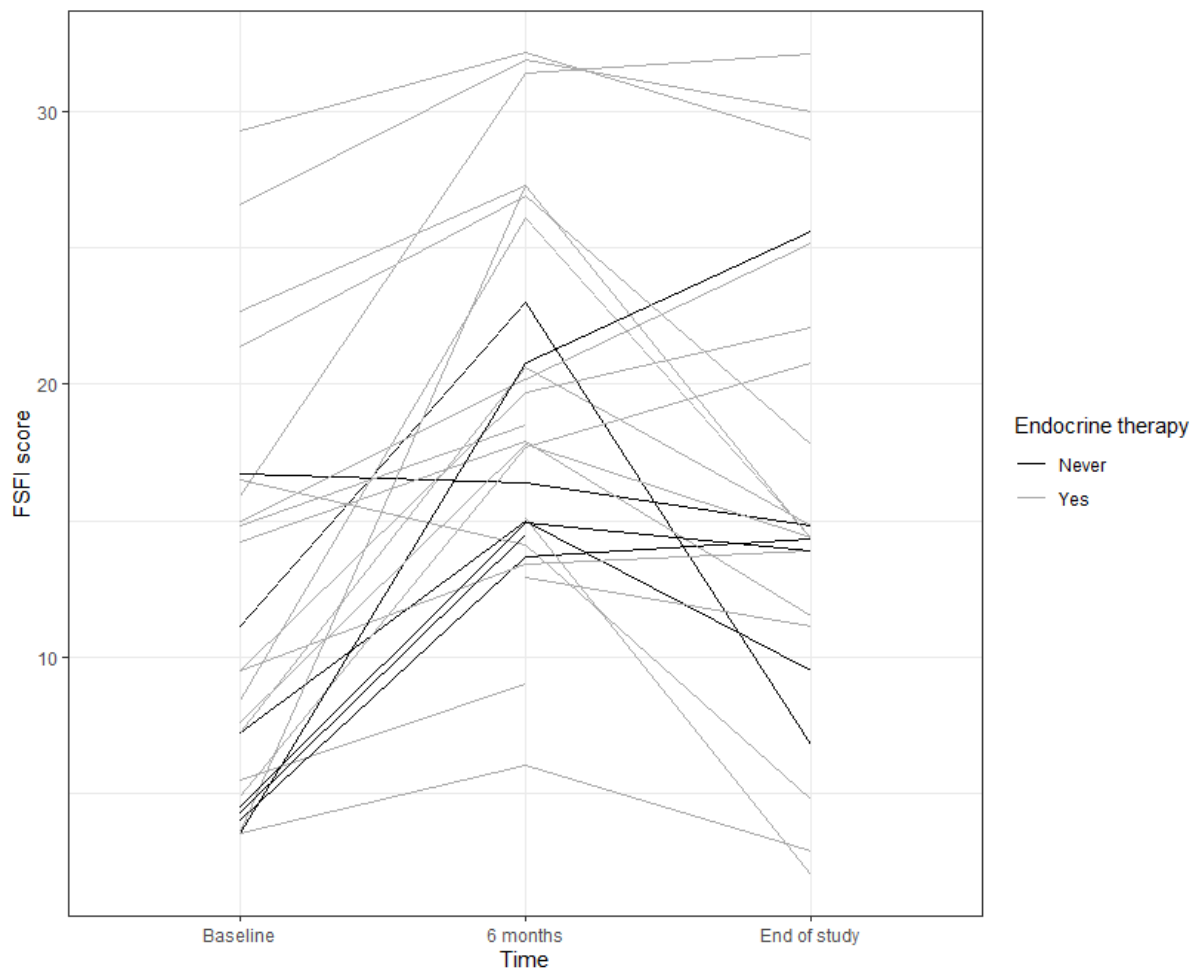

Figure 2S. Evolution of FSFI total score over time according to chemotherapy status (yes/no)

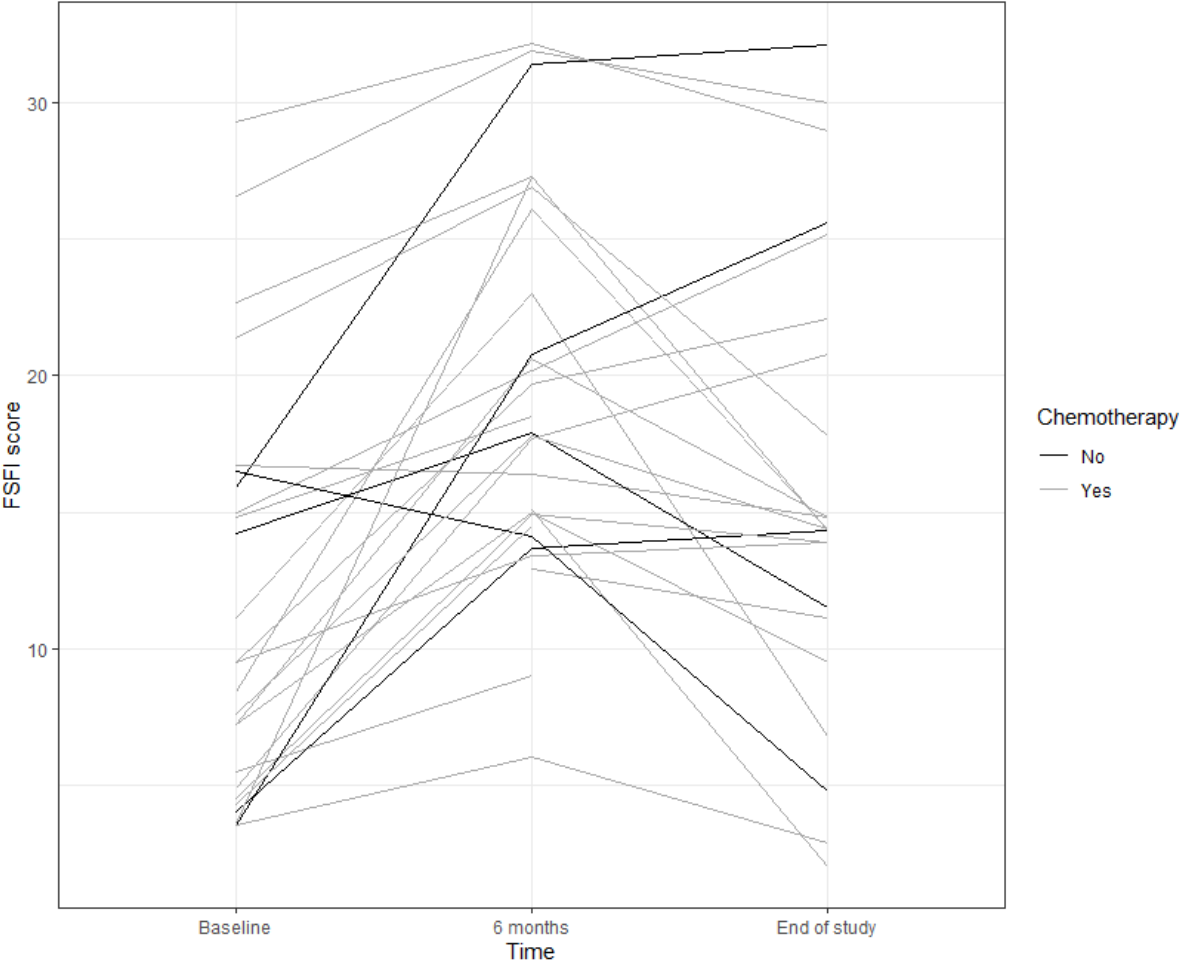

Supplement: 10549_2021_6226_MOESM1_ESM.pdf [file 10549_2021_6226_MOESM1_ESM.pdf]
